# Supplementary material
Source: PubMed Central journal article supplement (PMC4864469)

## Supplementary data

### **Hypochlorite-modified albumin colocalizes with RAGE in the artery wall and promotes MCP-1 expression via the RAGE-Erk1/2 MAP-kinase pathway**

Gunther Marsche, Michaela Semlitsch, Astrid Hammer, Sasa Frank, Bernd Weigle, Nina Demling, Kurt Schmidt, Werner Windischhofer, Georg Waeg, Wolfgang Sattler, Ernst Malle

#### **Characterization of modified albumin preparations**

Albumin was modified by HOCl (added as reagent or generated by the MPO-H<sub>2</sub>O<sub>2</sub>-chloride system) or by D-glucose as described in the “Methods” section. Amino acid analyses revealed that Cys and Met are the most sensitive amino acids towards HOCl-modification followed by tyrosine (Table I). Less reactive were His, Arg, and Lys that are consumed in a dose-dependent fashion up to 20-50% at the highest HOCl concentration used. As expected, MPO-modification of albumin led to similar amino acid changes as seen with HOCl-albumin (oxidant:protein molar ratio of 50:1); only lysine residues are more readily modified by the MPO-system. The loss of Lys, His, and Arg, respectively, was more pronounced in AGE-albumin.

Coomassie staining of modified albumin preparations (subjected to SDS-PAGE) revealed a gradual loss of monomeric albumin with concomitant formation of dimeric and high molecular mass aggregates after treatment with increasing HOCl-concentrations (Fig. I). The same pattern was seen with MPO-albumin. Modification of albumin by

glucose led to a slight increase in the molecular mass of monomeric albumin (data in line with others (1)) with concomitant formation of high molecular mass aggregates. Immunochemical detection of HOCl-modified epitopes in the modified albumin preparations (subjected to SDS-PAGE and Western blotting) confirms data obtained with Coomassie staining (Fig. I). An increasing oxidant:protein molar ratio was paralleled by increased staining intensity of HOCl-modified monomeric, dimeric and trimeric albumin bands. The same pattern was observed with MPO-albumin. As expected no HOCl-modified epitopes were detected in AGE-albumin (Fig. I).

#### References

1. Valencia, J.V., Stephen, C.W., Douglas, Q., Geesje, H.K., DeGroot, J., TeKoppele, J.M., Hughes, T.E. (2004) Advanced glycation end product ligands for the receptor for advanced glycation end products: biochemical characterization and formation kinetics. *Anal. Biochem.* **324**, 68-78

**Table I**

Amino acid analyses of albumin preparations

Amino acid analyses of native albumin (Alb), HOCl-Alb (at indicated oxidant:protein molar ratio), MPO-Alb (assuming quantitative conversion of H<sub>2</sub>O<sub>2</sub> into HOCl, an oxidant:protein molar ratio of ~50:1 could be expected), and AGE-Alb was performed as described in the "Methods" section. The relative electrophoretic mobility of HOCl-Alb was 1.68 (25:1), 1.77 (50:1), and 1.95 (100:1), respectively. Data shown represent mean values from two experiments performed in duplicates. Results are expressed in mol of amino acids/mol of albumin. n.d. = not detectable.

## **Figure I**

### Characterization of HOCl-albumin and AGE-albumin

Five  $\mu\text{g}$  of native albumin (Alb), HOCl-Alb (oxidant:protein molar ratio of 25:1, 50:1, and 100:1), MPO-Alb (assuming quantitative conversion of  $\text{H}_2\text{O}_2$  into HOCl, an oxidant:protein molar ratio of  $\sim 50:1$  could be expected), and AGE-Alb were subjected to SDS-PAGE (3,75-20% gradient gels). Proteins were either (A) Coomassie stained or (B) transferred to nitrocellulose for immunochemical detection of HOCl-modified epitopes using clone 2D10G9 as primary antibody. Immunoreactive bands were visualized with HRP-conjugated chicken anti-mouse IgG. The molecular mass of the marker proteins is indicated at the left; the arrow indicates the position of native Alb.

## **Figure II**

### Blocking of HOCl-albumin binding by anti-sRAGE IgG

RAGE-HEK cells were incubated with 10  $\mu\text{g}/\text{ml}$   $^{125}\text{I}$ -HOCl-Alb (oxidant:protein molar ratio of 100:1) or  $^{125}\text{I}$ -AGE-Alb for 2 h at 37°C in culture medium in the absence or presence of 50  $\mu\text{g}/\text{ml}$  non immune or polyclonal anti-sRAGE IgG. Binding of  $^{125}\text{I}$ -HOCl/AGE-albumin to HEK cells was measured as described in the Methods section.

# Table I

|            | Alb  | HOCl-Alb<br>(25:1) | HOCl-Alb<br>(50:1) | HOCl-Alb<br>(100:1) | MPO-Alb | AGE-Alb |
|------------|------|--------------------|--------------------|---------------------|---------|---------|
| Cysteine   | 2.8  | 5.0                | 3.3                | 0.0                 | 1.5     | 0.0     |
| Methionine | n.d. | n.d.               | n.d.               | n.d.                | n.d.    | n.d.    |
| Tyrosine   | 32.8 | 26.2               | 21.6               | 10.2                | 19.8    | 20.5    |
| Lysine     | 85.5 | 77.7               | 77.0               | 71.3                | 56.5    | 34.2    |
| Histidine  | 25.8 | 26.3               | 24.8               | 20.4                | 23.4    | 16.8    |
| Arginine   | 38.9 | 35.2               | 33.5               | 30.6                | 41.4    | 23.1    |

Figure I

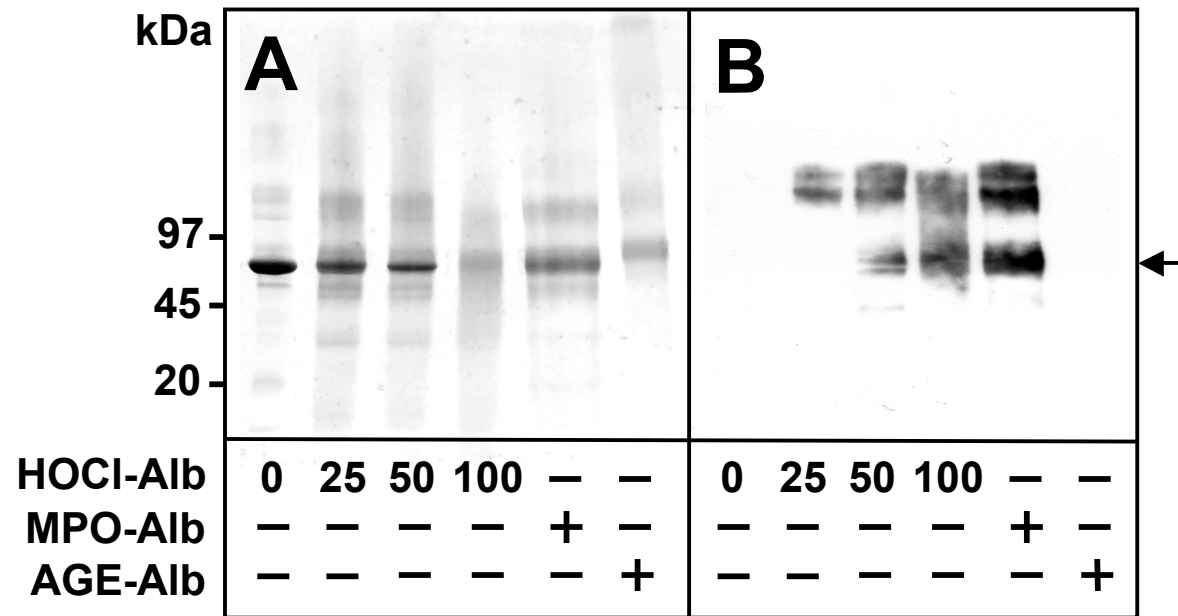

Figure II

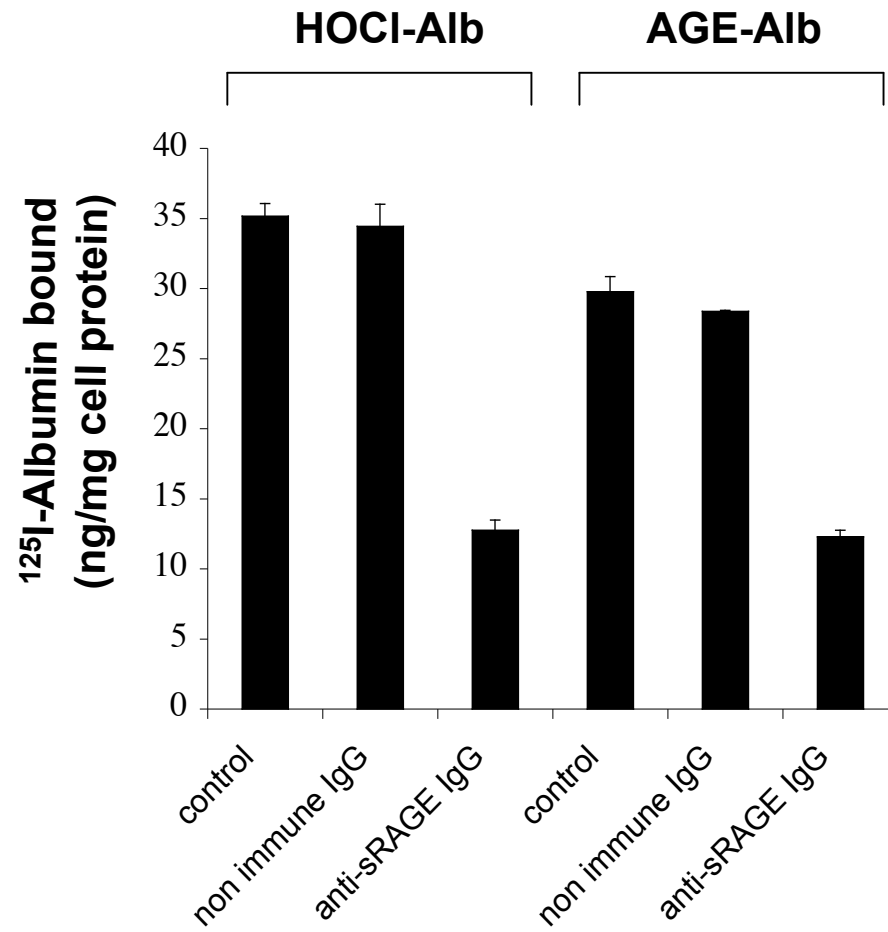

Supplement: NIHMS34552-supplement-Marsche_Supp.pdf [file NIHMS34552-supplement-Marsche_Supp.pdf]
